# Supplementary material
Source: Springer Nature journal article supplement (https://www.springermedizin.de/resource/supplementary/13058_2008_2118_MOESM7_ESM.pdf/9700674)

**A)**

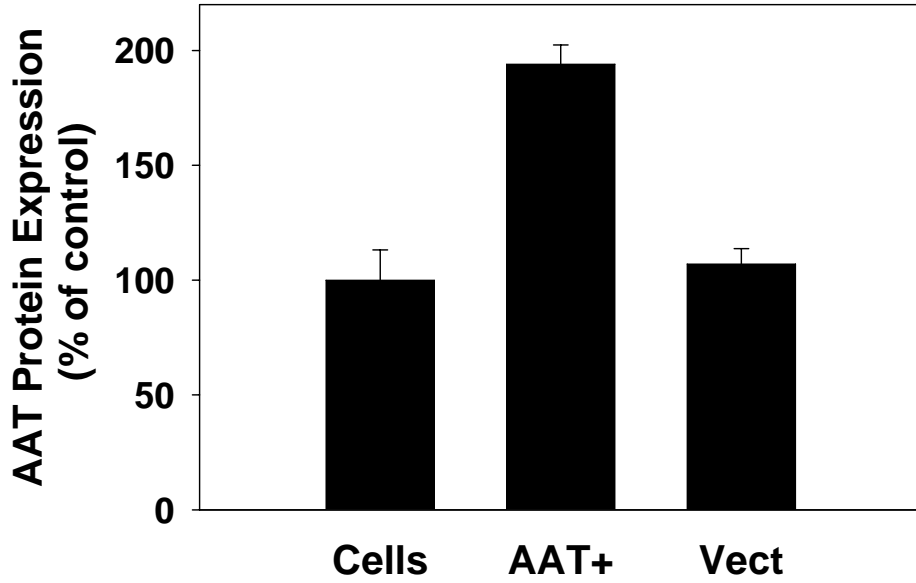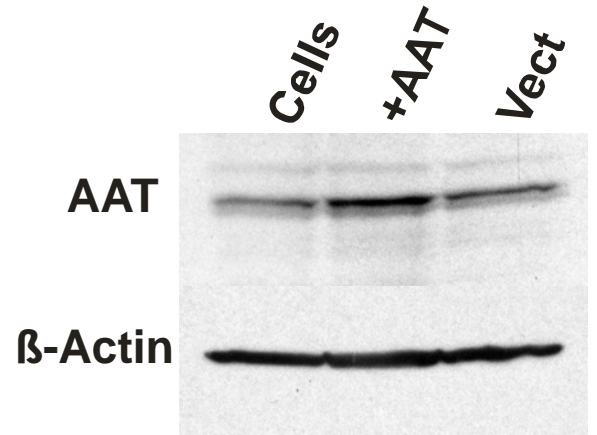

**B)**

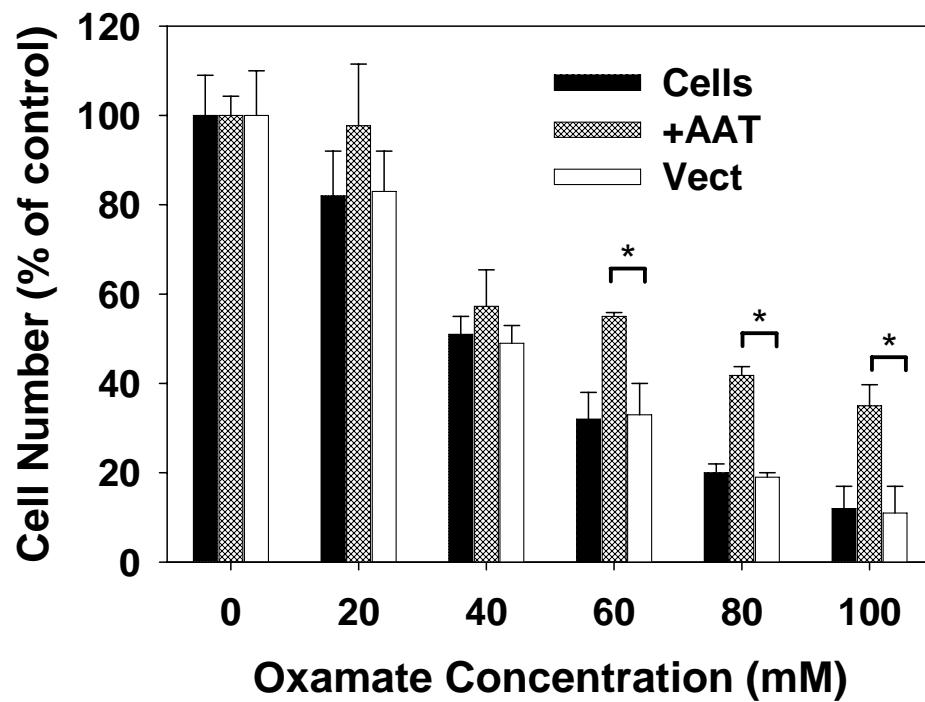

Supplement: MOESM7 [file 9700674]
